# Supplementary material
Source: PubMed Central journal article supplement (PMC7893305)
Supplement: mmc1.pdf [file mmc1.pdf]

# How Health-Care Organizations Implement Shared Decision-making When It Is Required for Reimbursement

## The Case of Lung Cancer Screening

*Amir Alishahi Tabriz, MD, PhD; Christine Neslund-Dudas, PhD; Kea Turner, PhD; M. Patricia Rivera, MD; Daniel S. Reuland, MD; and Jennifer Elston Lafata, PhD*

CHEST 2021; 159(1):413-425

*Online supplements are not copyedited prior to posting and the author(s) take full responsibility for the accuracy of all data.*

© 2020 AMERICAN COLLEGE OF CHEST PHYSICIANS. Reproduction of this article is prohibited without written permission from the American College of Chest Physicians. See online for more details. DOI: 10.1016/j.chest.2020.07.078

## e-Appendix 1. Interview guide

---

### Part I: Intervention characteristics

1. Would you please describe how SDM for lung cancer-screening is done in your organization? Has this changed with time? How?
  - a. Is it a centralized or decentralist process? Is it the same across the health system or does it vary? If it is decentralized, can you tell me about any variation that exists?
  - b. What are the main advantages and disadvantages of your program?
  - c. How does the workflow work? From patient identification to determining what to do with results and follow up?
    - i. When and how do you communicate SDM process with patients? Before or after CT?
    - ii. Where were the patients referred from and by whom? Any specific clinic or team?
    - iii. Is there a specific decision aid or other educational material that you are using?
    - iv. Do you use some sort of template charting for documentation?
    - v. Do you have a lung nodule tracking program? Use something else to monitor follow up?
  - d. Is your SDM process for lung cancer screening multidisciplinary? Primarily housed within one group/team?
  - e. How do you monitor the implementation of SDM? How do you check if your SDM is implementing as you just described?
  - f. Who are the core members of your organization's SDM for lung cancer screening process/program? How are nurses involved? How are tobacco treatment specialist? Are there other staff dedicated to the program?
  - g. Which patients does your health system include in its SDM process? All patients, only Medicare patients? Something else?
2. Does your health system have a smoking cessation program? How is it related to the SDM program for lung cancer screening?

### Part II: Inner setting

1. What kinds of operational changes or alterations did your health system undertake for SDM for lung cancer screening to work effectively in your setting?
  - a. Changes in information systems or electronic records systems?
2. What resources did you receive, or would have liked to receive?
3. What challenges did you encounter? How did you overcome those challenges?

### Part III: Outer setting

1. How 2015 CMS policy requirements changed your SDM for LCS process? How do you modify or change your SDM because of that?

### Part IV: Process

1. How did your health system decide how to implement SDM for lung cancer screening? What different approaches to SDM did you consider? Who were the key decision makers?
  - a. What kind of information or evidence did your health system collect or consider when deciding?
  - b. Who originally advocated for the program / approach? What was their role?
  - c. Was the same person/people who served as the advocate/s for the program / approach the ones responsible for implementing the program?
  - d. Were they formally appointed in this position, or was it an informal role?
  - e. What position do these advocates have in your health system?

**e-Table 1. Consolidated criteria for reporting qualitative studies (COREQ): 32-item checklist<sup>1</sup>**

| No. Item                                       | Guide questions/description                                                                                                                              | Reported on Page #                                                                                                                                                                                                                                                                                                   |
|------------------------------------------------|----------------------------------------------------------------------------------------------------------------------------------------------------------|----------------------------------------------------------------------------------------------------------------------------------------------------------------------------------------------------------------------------------------------------------------------------------------------------------------------|
| <b>Domain 1: Research team and reflexivity</b> |                                                                                                                                                          |                                                                                                                                                                                                                                                                                                                      |
| <i>Personal Characteristics</i>                |                                                                                                                                                          |                                                                                                                                                                                                                                                                                                                      |
| 1. Interviewer/facilitator                     | Which author/s conducted the interview or focus group?                                                                                                   | AAT                                                                                                                                                                                                                                                                                                                  |
| 2. Credentials                                 | What were the researcher's credentials? E.g. PhD,                                                                                                        | MD, PhD, MPH                                                                                                                                                                                                                                                                                                         |
| 3. Occupation                                  | What was their occupation at the time of the study?                                                                                                      | Postdoctoral research fellow                                                                                                                                                                                                                                                                                         |
| 4. Gender                                      | Was the researcher male or female?                                                                                                                       | Male                                                                                                                                                                                                                                                                                                                 |
| 5. Experience and training                     | What experience or training did the researcher have?                                                                                                     | In addition to PhD in health service research he has considerable qualitative research and interviewing experiences.                                                                                                                                                                                                 |
| <i>Relationship with participants</i>          |                                                                                                                                                          |                                                                                                                                                                                                                                                                                                                      |
| 6. Relationship established                    | Was a relationship established prior to study commencement?                                                                                              | Yes                                                                                                                                                                                                                                                                                                                  |
| 7. Participant knowledge of the interviewer    | What did the participants know about the researcher? e.g. personal goals, reasons for doing the research                                                 | Participants knew the research objectives, how the authors will protect the data, how the authors will use the data, and absence of any conflict of interest. They also know that all results will be reported in aggregate and not attributed to them or their health system.                                       |
| 8. Interviewer characteristics                 | What characteristics were reported about the interviewer/facilitator? e.g. Bias, assumptions, reasons and interests in the research topic                | We report that interviews were conducted by one, clinician scientist (AAT) on page 16 where study limitations are described.                                                                                                                                                                                         |
| <b>Domain 2: study design</b>                  |                                                                                                                                                          |                                                                                                                                                                                                                                                                                                                      |
| <i>Theoretical framework</i>                   |                                                                                                                                                          |                                                                                                                                                                                                                                                                                                                      |
| 9. Methodological orientation and Theory       | What methodological orientation was stated to underpin the study? e.g. grounded theory, discourse analysis, ethnography, phenomenology, content analysis | We used an interview guide using the theory-based domains and constructs within the Consolidated Framework for Implementation Research (CFIR). Using this framework, we selected four domains (i.e., intervention characteristics, inner setting, outer setting, and process) and 10 constructs (relative advantage, |

|                              |                                                                                           |                                                                                                                                                                                                                                                                                                                                                                                                                                                                                                                                                                                                                                                                                                                                                                                                                                                                                                                                                                                                                                                                                                                                |
|------------------------------|-------------------------------------------------------------------------------------------|--------------------------------------------------------------------------------------------------------------------------------------------------------------------------------------------------------------------------------------------------------------------------------------------------------------------------------------------------------------------------------------------------------------------------------------------------------------------------------------------------------------------------------------------------------------------------------------------------------------------------------------------------------------------------------------------------------------------------------------------------------------------------------------------------------------------------------------------------------------------------------------------------------------------------------------------------------------------------------------------------------------------------------------------------------------------------------------------------------------------------------|
|                              |                                                                                           | <p>adaptability, cost, external policies &amp; incentives, structural characteristics, available resources, access to knowledge &amp; information, planning, opinion leaders, and reflecting &amp; evaluating) that most aligned with our research aims.<br/>Page 6-7</p>                                                                                                                                                                                                                                                                                                                                                                                                                                                                                                                                                                                                                                                                                                                                                                                                                                                      |
| <i>Participant selection</i> |                                                                                           |                                                                                                                                                                                                                                                                                                                                                                                                                                                                                                                                                                                                                                                                                                                                                                                                                                                                                                                                                                                                                                                                                                                                |
| <p>10. Sampling</p>          | <p>How were participants selected? e.g. purposive, convenience, consecutive, snowball</p> | <p>We used a snowball sampling technique to identify key informants: we asked initial study respondents to refer us to additional potential participants. We attempted to identify and interview only individuals directly involved with implementing an LCS-SDM program (e.g., founding program directors/coordinators). We contacted 47 people of whom 34 agreed to participate or referred us to another participant they felt more qualified to discuss the organization's LCS-SDM program. Four referents refused to be interviewed. In instances when the individual directly involved with program implementation had left the organization (n=10), we interviewed the person currently responsible for LCS-SDM program management. In seven instances, we interviewed a second person within the same organization as the initial organizational respondent referred us to a second individual within the same organization because they thought that second individual could provide supplemental information regarding the background and key determinants of their organization's LCS-SDM program. We recruited</p> |

|                                  |                                                                                   |                                                                                                                                                                                                                                                                                                                                                                                                                                                 |
|----------------------------------|-----------------------------------------------------------------------------------|-------------------------------------------------------------------------------------------------------------------------------------------------------------------------------------------------------------------------------------------------------------------------------------------------------------------------------------------------------------------------------------------------------------------------------------------------|
|                                  |                                                                                   | participants until data saturation was achieved. Page 6-7                                                                                                                                                                                                                                                                                                                                                                                       |
| 11. Method of approach           | How were participants approached? e.g. face-to-face, telephone, mail, email       | Email, page 6                                                                                                                                                                                                                                                                                                                                                                                                                                   |
| 12. Sample size                  | How many participants were in the study?                                          | 30, page 7                                                                                                                                                                                                                                                                                                                                                                                                                                      |
| 13. Non-participation            | How many people refused to participate or dropped out? Reasons?                   | 13 people did not respond to invitation emails. Four people refused to participate because they were not directly involve with implementation of SDM for LCS. Page 6                                                                                                                                                                                                                                                                            |
| <i>Setting</i>                   |                                                                                   |                                                                                                                                                                                                                                                                                                                                                                                                                                                 |
| 14. Setting of data collection   | Where was the data collected? e.g. home, clinic, workplace                        | All data were collected via telephone interviews                                                                                                                                                                                                                                                                                                                                                                                                |
| 15. Presence of non-participants | Was anyone else present besides the participants and researchers?                 | no                                                                                                                                                                                                                                                                                                                                                                                                                                              |
| 16. Description of sample        | What are the important characteristics of the sample? e.g. demographic data, date | We interviewed only individuals directly involved with implementing an LCS-SDM program (e.g., founding program directors/coordinators). We interviewed 30 key informants directly involved with implementing and/or managing SDM for LCS in their organization from 23 healthcare organizations represents 12 states and the four US Census regions. We did not ask informants for information about themselves beyond their training. Page 6-7 |
| <i>Data collection</i>           |                                                                                   |                                                                                                                                                                                                                                                                                                                                                                                                                                                 |
| 17. Interview guide              | Were questions, prompts, guides provided by the authors? Was it pilot tested?     | Yes, we used a semi-structured interview guide, and conducted two pilot interviews to ensure clarity and minimize interview length and repetitiveness. Page 7                                                                                                                                                                                                                                                                                   |
| 18. Repeat interviews            | Were repeat interviews carried out? If yes, how many?                             | No                                                                                                                                                                                                                                                                                                                                                                                                                                              |
| 19. Audio/visual recording       | Did the research use audio or visual recording to collect the data?               | Yes, Page 7                                                                                                                                                                                                                                                                                                                                                                                                                                     |
| 20. Field notes                  | Were field notes made during and/or after the inter view or focus group?          | Yes, Page 7                                                                                                                                                                                                                                                                                                                                                                                                                                     |
| 21. Duration                     | What was the duration of the inter views or focus group?                          | Between 25-50 minutes                                                                                                                                                                                                                                                                                                                                                                                                                           |
| 22. Data saturation              | Was data saturation discussed?                                                    | Yes, Page 6                                                                                                                                                                                                                                                                                                                                                                                                                                     |
| 23. Transcripts returned         | Were transcripts returned to participants for comment and/or correction?          | No                                                                                                                                                                                                                                                                                                                                                                                                                                              |

| <b>Domain 3: analysis and findings</b> |                                                                                                                                 |                                                                                                                                                                                |
|----------------------------------------|---------------------------------------------------------------------------------------------------------------------------------|--------------------------------------------------------------------------------------------------------------------------------------------------------------------------------|
| <i>Data analysis</i>                   |                                                                                                                                 |                                                                                                                                                                                |
| 24. Number of data coders              | How many data coders coded the data?                                                                                            | 2 (AAT, KT), Page 7                                                                                                                                                            |
| 25. Description of the coding tree     | Did authors provide a description of the coding tree?                                                                           | Yes, page 6 and 7                                                                                                                                                              |
| 26. Derivation of themes               | Were themes identified in advance or derived from the data?                                                                     | Two coders (AAT, KT) developed a preliminary codebook and themes using an available CFIR project template. They also developed additional codes as new themes emerged. Page 7  |
| 27. Software                           | What software, if applicable, was used to manage the data?                                                                      | Dedoose, version 8.1.8. Page 7                                                                                                                                                 |
| 28. Participant checking               | Did participants provide feedback on the findings?                                                                              | Yes, three respondents provided feedback on findings                                                                                                                           |
| <i>Reporting</i>                       |                                                                                                                                 |                                                                                                                                                                                |
| 29. Quotations presented               | Were participant quotations presented to illustrate the themes/findings? Was each quotation identified? e.g. participant number | Yes, Tables 1, 2 and 3                                                                                                                                                         |
| 30. Data and findings consistent       | Was there consistency between the data presented and the findings?                                                              | Yes, as illustrated by the consistency between text within the Results section and the illustrative quotes, there was consistency between the data presented and the findings. |
| 31. Clarity of major themes            | Were major themes clearly presented in the findings?                                                                            | Yes. they were.<br>From page 8 to 13                                                                                                                                           |
| 32. Clarity of minor themes            | Is there a description of diverse cases or discussion of minor themes?                                                          | Discussion of major and minor themes<br>From page 8 to 13                                                                                                                      |

1- Tong A, Sainsbury P, Craig J. Consolidated criteria for reporting qualitative research (COREQ): a 32-item checklist for interviews and focus groups. *International Journal for Quality in Health Care*. 2007. Volume 19, Number 6: pp. 349 – 357
